# Supplementary material for: Fingerprinting, Antimicrobial, Antioxidant, Anticancer, Cyclooxygenase and Metabolic Enzymes Inhibitory Characteristic Evaluations of Stachys viticina Boiss. Essential Oil
Source: PubMed Central journal article supplement (PMC6864729; doi:10.3390/molecules24213880), 2019-10-28
Supplement: molecules-24-03880-s001.pdf [file molecules-24-03880-s001.pdf]

1

Supplementary material Figures S1-S5

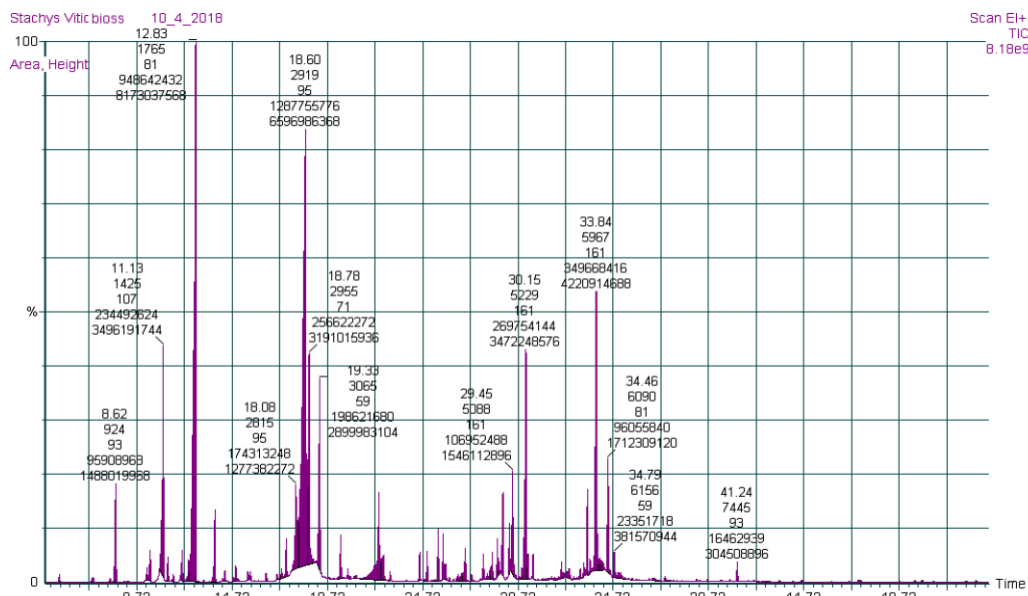

2

3

Figure 1. GC-MS chromatogram of *S. viticina* EO.

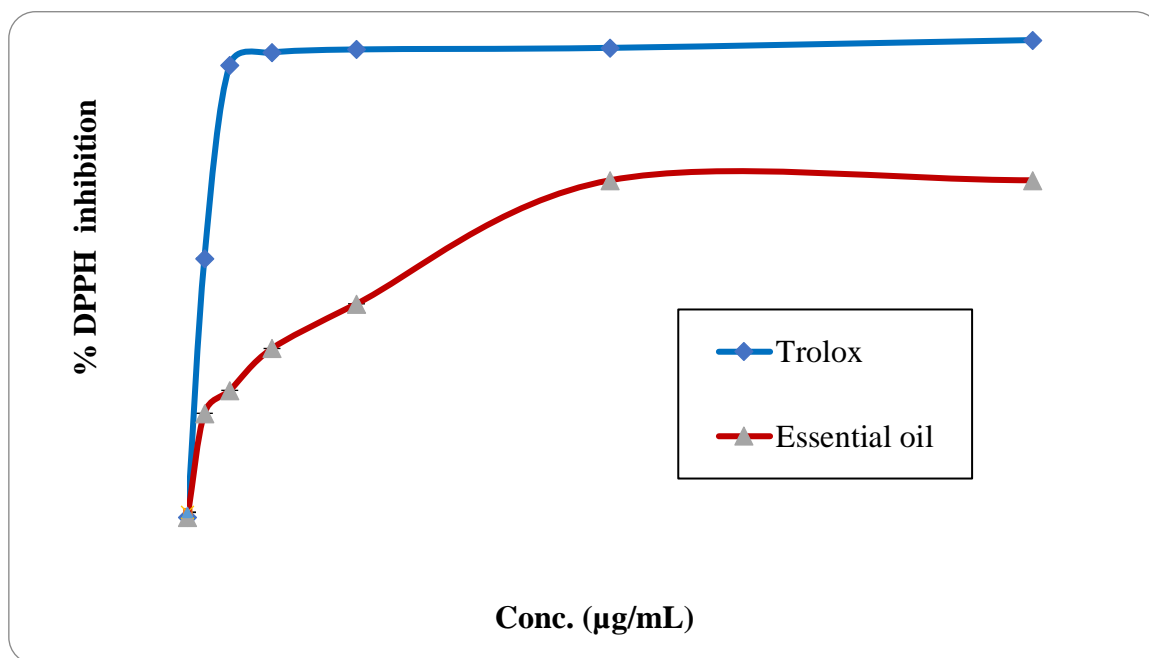

4

5

Figure 2. DPPH Inhibition % by Trolox (positive control) and *S. viticina* EO.

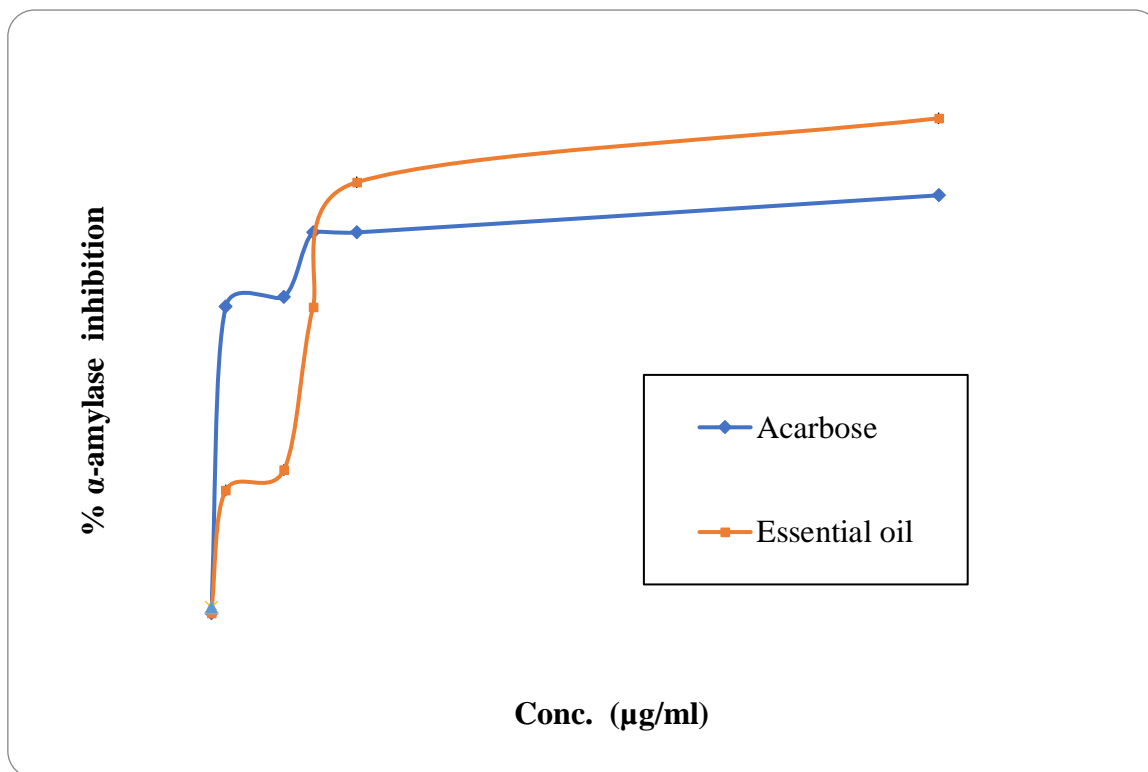

6

7

Figure 3. The  $\alpha$ -amylase inhibitory potential by Acarbose (positive control) and *S. viticina* EO.

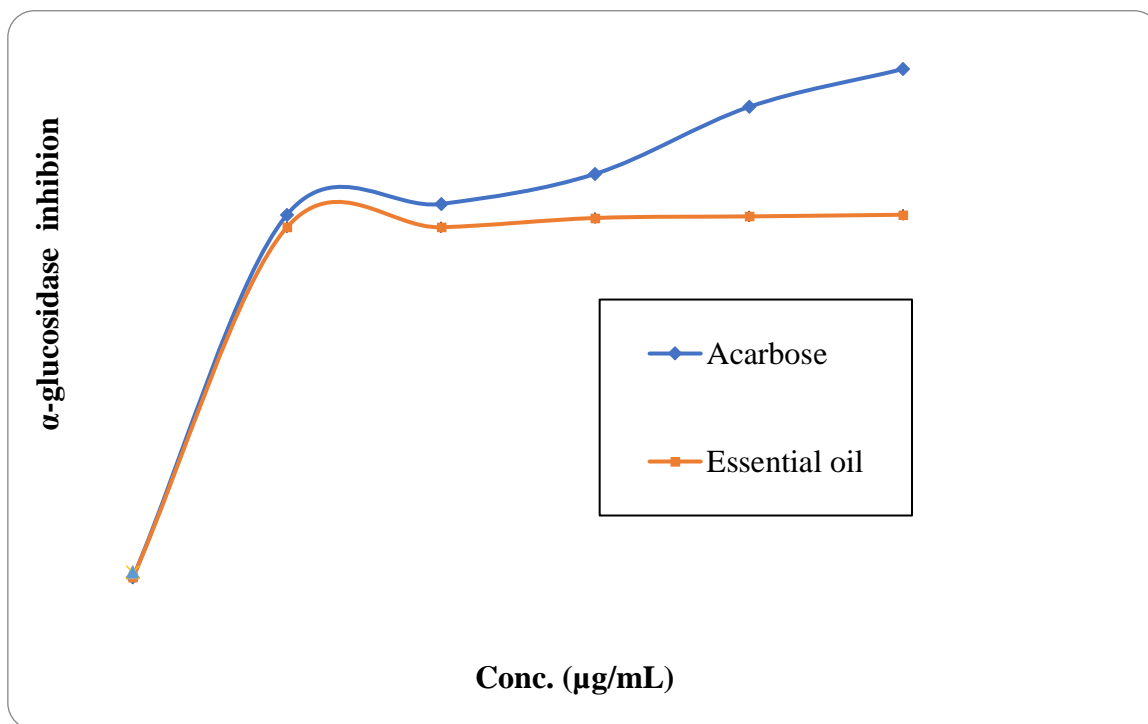

8

9

Figure 4. The  $\alpha$ -glucosidase inhibitory potential by Acarbose (positive control) and *S. viticina* EO.

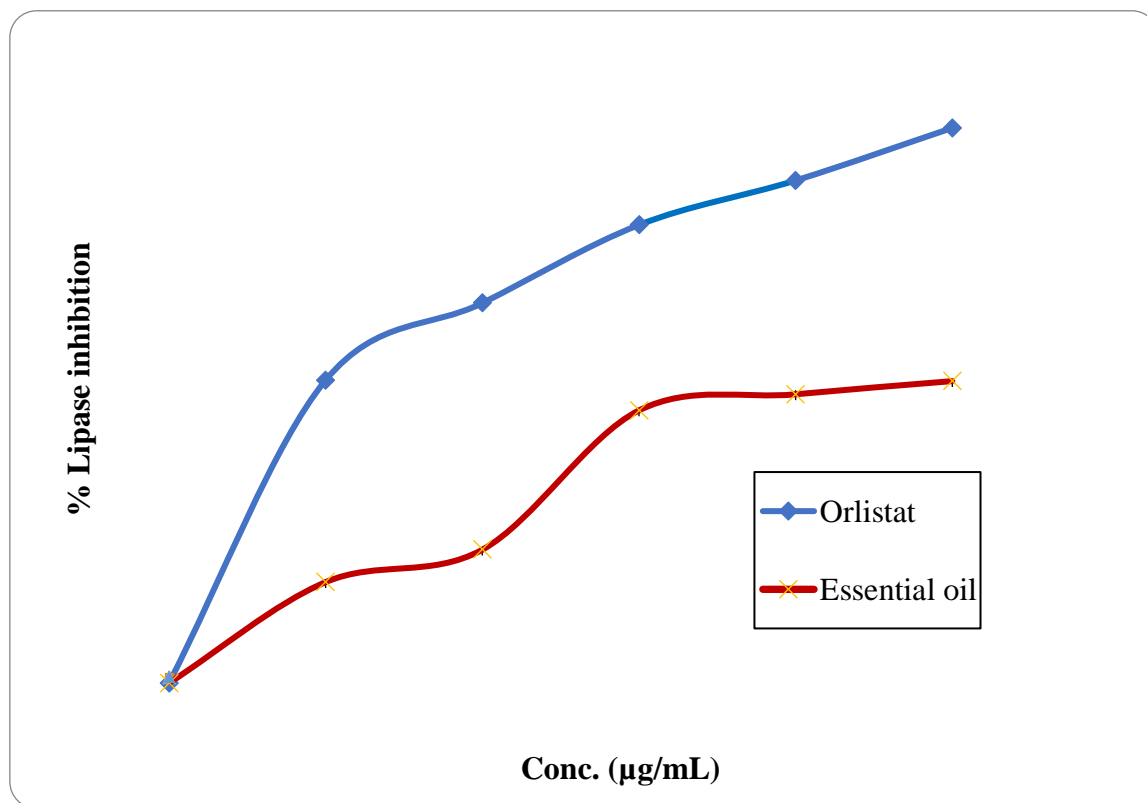

10

11

**Figure 5.** Lipase enzyme inhibitory activity by *S. viticina* EO and Orlistat (positive control).
